# Supplementary material for: Single cell proteomics analysis of drug response shows its potential as a drug discovery platform
Source: Royal Society of Chemistry journal article supplement (doi:10.1039/d3mo00124e), 2023-08-16
Supplement: d3mo00124e2.xlsx [file d3mo00124e2.xlsx]

## Sheet: J30minvs4hoursenrichment_Reacto
#term ID	term description	observed gene count	background gene count	false discovery rate	matching proteins in your network (IDs)	matching proteins in your network (labels)
HSA-453279	Mitotic G1-G1/S phases	15	145	7.52e-13	ENSP00000227507,ENSP00000230056,ENSP00000255465,ENSP00000256442,ENSP00000257904,ENSP00000261254,ENSP00000262643,ENSP00000265734,ENSP00000266970,ENSP00000274026,ENSP00000301019,ENSP00000362082,ENSP00000378699,ENSP00000388107,ENSP00000429089	CCNA1,CCNA2,CCNB1,CCND1,CCND2,CCND3,CCNE1,CCNE2,CDK1,CDK2,CDK4,CDK6,CDT1,GMNN,UBA52
HSA-2559583	Cellular Senescence	15	161	1.58e-12	ENSP00000215832,ENSP00000255465,ENSP00000257904,ENSP00000262643,ENSP00000265734,ENSP00000266970,ENSP00000274026,ENSP00000307705,ENSP00000330074,ENSP00000332194,ENSP00000339566,ENSP00000358151,ENSP00000363641,ENSP00000388107,ENSP00000429089	CCNA1,CCNA2,CCNE1,CCNE2,CDK2,CDK4,CDK6,HIST1H1B,HIST1H1C,HIST1H1E,HIST2H2AC,HIST2H2BE,MAPK1,TXN,UBA52
HSA-69278	Cell Cycle, Mitotic	20	483	4.46e-11	ENSP00000215832,ENSP00000227507,ENSP00000230056,ENSP00000255465,ENSP00000256442,ENSP00000257904,ENSP00000261254,ENSP00000262643,ENSP00000265734,ENSP00000266970,ENSP00000274026,ENSP00000288207,ENSP00000301019,ENSP00000332194,ENSP00000358151,ENSP00000362082,ENSP00000378699,ENSP00000388107,ENSP00000429089,ENSP00000448012	CCNA1,CCNA2,CCNB1,CCNB2,CCND1,CCND2,CCND3,CCNE1,CCNE2,CDK1,CDK2,CDK4,CDK6,CDT1,CEP290,GMNN,HIST2H2AC,HIST2H2BE,MAPK1,UBA52
HSA-2262752	Cellular responses to stress	18	384	8.54e-11	ENSP00000215832,ENSP00000241052,ENSP00000255465,ENSP00000257904,ENSP00000262643,ENSP00000262746,ENSP00000265734,ENSP00000266970,ENSP00000274026,ENSP00000301522,ENSP00000307705,ENSP00000330074,ENSP00000332194,ENSP00000339566,ENSP00000358151,ENSP00000363641,ENSP00000388107,ENSP00000429089	CAT,CCNA1,CCNA2,CCNE1,CCNE2,CDK2,CDK4,CDK6,HIST1H1B,HIST1H1C,HIST1H1E,HIST2H2AC,HIST2H2BE,MAPK1,PRDX1,PRDX2,TXN,UBA52
HSA-2559586	DNA Damage/Telomere Stress Induced Senescence	10	61	1.77e-10	ENSP00000255465,ENSP00000262643,ENSP00000266970,ENSP00000274026,ENSP00000307705,ENSP00000330074,ENSP00000332194,ENSP00000339566,ENSP00000358151,ENSP00000429089	CCNA1,CCNA2,CCNE1,CCNE2,CDK2,HIST1H1B,HIST1H1C,HIST1H1E,HIST2H2AC,HIST2H2BE
HSA-69206	G1/S Transition	12	128	3.19e-10	ENSP00000227507,ENSP00000230056,ENSP00000255465,ENSP00000256442,ENSP00000257904,ENSP00000262643,ENSP00000266970,ENSP00000274026,ENSP00000301019,ENSP00000378699,ENSP00000388107,ENSP00000429089	CCNA1,CCNA2,CCNB1,CCND1,CCNE1,CCNE2,CDK1,CDK2,CDK4,CDT1,GMNN,UBA52
HSA-74751	Insulin receptor signalling cascade	8	46	1.27e-08	ENSP00000215832,ENSP00000222254,ENSP00000262995,ENSP00000304895,ENSP00000340944,ENSP00000365016,ENSP00000401303,ENSP00000428056	GAB1,IRS1,IRS2,MAPK1,PIK3R1,PIK3R2,PTPN11,SHC1
HSA-2559582	Senescence-Associated Secretory Phenotype (SASP)	9	78	2.16e-08	ENSP00000215832,ENSP00000255465,ENSP00000257904,ENSP00000265734,ENSP00000266970,ENSP00000274026,ENSP00000332194,ENSP00000358151,ENSP00000388107	CCNA1,CCNA2,CDK2,CDK4,CDK6,HIST2H2AC,HIST2H2BE,MAPK1,UBA52
HSA-187577	SCF(Skp2)-mediated degradation of p27/p21	8	57	4.83e-08	ENSP00000227507,ENSP00000255465,ENSP00000257904,ENSP00000262643,ENSP00000266970,ENSP00000274026,ENSP00000388107,ENSP00000429089	CCNA1,CCNA2,CCND1,CCNE1,CCNE2,CDK2,CDK4,UBA52
HSA-1266738	Developmental Biology	22	1023	1.43e-07	ENSP00000206765,ENSP00000215832,ENSP00000222254,ENSP00000257192,ENSP00000257198,ENSP00000257904,ENSP00000262995,ENSP00000288699,ENSP00000332194,ENSP00000340944,ENSP00000342710,ENSP00000353608,ENSP00000357731,ENSP00000358151,ENSP00000362082,ENSP00000365016,ENSP00000365465,ENSP00000369129,ENSP00000388107,ENSP00000393417,ENSP00000401303,ENSP00000428056	CASP14,CCND3,CDK4,CDSN,DPYSL5,DSC1,DSC3,DSG1,DSP,GAB1,HIST2H2AC,HIST2H2BE,IRS2,KRT77,LOR,MAPK1,PIK3R1,PIK3R2,PTPN11,SHC1,TGM1,UBA52
HSA-69273	Cyclin A/B1/B2 associated events during G2/M transition	6	25	3.24e-07	ENSP00000255465,ENSP00000256442,ENSP00000266970,ENSP00000274026,ENSP00000288207,ENSP00000378699	CCNA1,CCNA2,CCNB1,CCNB2,CDK1,CDK2
HSA-6791312	TP53 Regulates Transcription of Cell Cycle Genes	7	49	3.84e-07	ENSP00000255465,ENSP00000256442,ENSP00000262643,ENSP00000266970,ENSP00000274026,ENSP00000378699,ENSP00000429089	CCNA1,CCNA2,CCNB1,CCNE1,CCNE2,CDK1,CDK2
HSA-1538133	G0 and Early G1	6	27	3.98e-07	ENSP00000255465,ENSP00000262643,ENSP00000266970,ENSP00000274026,ENSP00000378699,ENSP00000429089	CCNA1,CCNA2,CCNE1,CCNE2,CDK1,CDK2
HSA-212436	Generic Transcription Pathway	22	1112	4.12e-07	ENSP00000008391,ENSP00000215832,ENSP00000227507,ENSP00000246672,ENSP00000255465,ENSP00000256442,ENSP00000257904,ENSP00000261254,ENSP00000262643,ENSP00000262746,ENSP00000265734,ENSP00000266970,ENSP00000274026,ENSP00000301522,ENSP00000332194,ENSP00000340944,ENSP00000358151,ENSP00000362082,ENSP00000363641,ENSP00000378699,ENSP00000388107,ENSP00000429089	CCNA1,CCNA2,CCNB1,CCND1,CCND2,CCND3,CCNE1,CCNE2,CDK1,CDK2,CDK4,CDK6,HIST2H2AC,HIST2H2BE,MAPK1,NR1D1,PRDX1,PRDX2,PTPN11,TFAP2D,TXN,UBA52
HSA-73857	RNA Polymerase II Transcription	23	1233	4.84e-07	ENSP00000008391,ENSP00000215832,ENSP00000227507,ENSP00000246672,ENSP00000255465,ENSP00000256442,ENSP00000257904,ENSP00000261254,ENSP00000262643,ENSP00000262746,ENSP00000265734,ENSP00000266970,ENSP00000274026,ENSP00000301522,ENSP00000332194,ENSP00000340944,ENSP00000358151,ENSP00000362082,ENSP00000363641,ENSP00000378699,ENSP00000388107,ENSP00000429089,ENSP00000438527	CCNA1,CCNA2,CCNB1,CCND1,CCND2,CCND3,CCNE1,CCNE2,CDK1,CDK2,CDK4,CDK6,HIST2H2AC,HIST2H2BE,MAPK1,NR1D1,PRDX1,PRDX2,PTPN11,TFAP2D,TXN,UBA52,ZC3H11A
HSA-6809371	Formation of the cornified envelope	9	128	5.91e-07	ENSP00000206765,ENSP00000257192,ENSP00000257198,ENSP00000342710,ENSP00000353608,ENSP00000357731,ENSP00000365465,ENSP00000369129,ENSP00000393417	CASP14,CDSN,DSC1,DSC3,DSG1,DSP,KRT77,LOR,TGM1
HSA-6804116	TP53 Regulates Transcription of Genes Involved in G1 Cell Cycle Arrest	5	14	7.59e-07	ENSP00000255465,ENSP00000262643,ENSP00000266970,ENSP00000274026,ENSP00000429089	CCNA1,CCNA2,CCNE1,CCNE2,CDK2
HSA-166520	Signaling by NTRKs	8	97	1.09e-06	ENSP00000215832,ENSP00000222254,ENSP00000262995,ENSP00000304895,ENSP00000340944,ENSP00000365016,ENSP00000401303,ENSP00000428056	GAB1,IRS1,IRS2,MAPK1,PIK3R1,PIK3R2,PTPN11,SHC1
HSA-109704	PI3K Cascade	6	36	1.29e-06	ENSP00000222254,ENSP00000262995,ENSP00000304895,ENSP00000340944,ENSP00000365016,ENSP00000428056	GAB1,IRS1,IRS2,PIK3R1,PIK3R2,PTPN11
HSA-210993	Tie2 Signaling	5	17	1.5e-06	ENSP00000222254,ENSP00000314897,ENSP00000340944,ENSP00000401303,ENSP00000428056	ANGPT2,PIK3R1,PIK3R2,PTPN11,SHC1
HSA-8934593	Regulation of RUNX1 Expression and Activity	5	17	1.5e-06	ENSP00000227507,ENSP00000261254,ENSP00000265734,ENSP00000340944,ENSP00000362082	CCND1,CCND2,CCND3,CDK6,PTPN11
HSA-8853659	RET signaling	6	38	1.53e-06	ENSP00000222254,ENSP00000262995,ENSP00000340944,ENSP00000365016,ENSP00000401303,ENSP00000428056	GAB1,IRS2,PIK3R1,PIK3R2,PTPN11,SHC1
HSA-6798695	Neutrophil degranulation	14	471	1.63e-06	ENSP00000215832,ENSP00000236671,ENSP00000241052,ENSP00000257192,ENSP00000257198,ENSP00000269491,ENSP00000346032,ENSP00000346442,ENSP00000349446,ENSP00000369129,ENSP00000373370,ENSP00000378669,ENSP00000419425,ENSP00000448012	ALDOA,ANXA2,ARG1,CAT,CEP290,CTSD,DSC1,DSG1,DSP,FLG2,LRMP,MAPK1,PPIA,SERPINB12
HSA-69242	S Phase	9	156	2.06e-06	ENSP00000227507,ENSP00000255465,ENSP00000257904,ENSP00000262643,ENSP00000266970,ENSP00000274026,ENSP00000301019,ENSP00000388107,ENSP00000429089	CCNA1,CCNA2,CCND1,CCNE1,CCNE2,CDK2,CDK4,CDT1,UBA52
HSA-8849470	PTK6 Regulates Cell Cycle	4	6	2.15e-06	ENSP00000227507,ENSP00000257904,ENSP00000262643,ENSP00000266970	CCND1,CCNE1,CDK2,CDK4
HSA-69231	Cyclin D associated events in G1	6	43	2.44e-06	ENSP00000227507,ENSP00000257904,ENSP00000261254,ENSP00000265734,ENSP00000362082,ENSP00000388107	CCND1,CCND2,CCND3,CDK4,CDK6,UBA52
HSA-69306	DNA Replication	8	122	3.51e-06	ENSP00000230056,ENSP00000255465,ENSP00000262643,ENSP00000266970,ENSP00000274026,ENSP00000301019,ENSP00000388107,ENSP00000429089	CCNA1,CCNA2,CCNE1,CCNE2,CDK2,CDT1,GMNN,UBA52
HSA-6811558	PI5P, PP2A and IER3 Regulate PI3K/AKT Signaling	7	85	4.86e-06	ENSP00000215832,ENSP00000222254,ENSP00000262995,ENSP00000304895,ENSP00000340944,ENSP00000365016,ENSP00000428056	GAB1,IRS1,IRS2,MAPK1,PIK3R1,PIK3R2,PTPN11
HSA-168249	Innate Immune System	19	1012	5.1e-06	ENSP00000215832,ENSP00000222254,ENSP00000236671,ENSP00000241052,ENSP00000257192,ENSP00000257198,ENSP00000269491,ENSP00000340944,ENSP00000346032,ENSP00000346442,ENSP00000349446,ENSP00000363641,ENSP00000369129,ENSP00000373370,ENSP00000378669,ENSP00000388107,ENSP00000419425,ENSP00000428056,ENSP00000448012	ALDOA,ANXA2,ARG1,CAT,CEP290,CTSD,DSC1,DSG1,DSP,FLG2,LRMP,MAPK1,PIK3R1,PIK3R2,PPIA,PTPN11,SERPINB12,TXN,UBA52
HSA-69052	Switching of origins to a post-replicative state	7	86	5.1e-06	ENSP00000255465,ENSP00000262643,ENSP00000266970,ENSP00000274026,ENSP00000301019,ENSP00000388107,ENSP00000429089	CCNA1,CCNA2,CCNE1,CCNE2,CDK2,CDT1,UBA52
HSA-198203	PI3K/AKT activation	4	9	5.51e-06	ENSP00000222254,ENSP00000304895,ENSP00000365016,ENSP00000428056	IRS1,IRS2,PIK3R1,PIK3R2
HSA-74749	Signal attenuation	4	9	5.51e-06	ENSP00000215832,ENSP00000304895,ENSP00000365016,ENSP00000401303	IRS1,IRS2,MAPK1,SHC1
HSA-2559580	Oxidative Stress Induced Senescence	7	92	7.13e-06	ENSP00000215832,ENSP00000257904,ENSP00000265734,ENSP00000332194,ENSP00000358151,ENSP00000363641,ENSP00000388107	CDK4,CDK6,HIST2H2AC,HIST2H2BE,MAPK1,TXN,UBA52
HSA-2219530	Constitutive Signaling by Aberrant PI3K in Cancer	6	58	8.86e-06	ENSP00000222254,ENSP00000262995,ENSP00000304895,ENSP00000340944,ENSP00000365016,ENSP00000428056	GAB1,IRS1,IRS2,PIK3R1,PIK3R2,PTPN11
HSA-69620	Cell Cycle Checkpoints	10	265	1.07e-05	ENSP00000255465,ENSP00000256442,ENSP00000262643,ENSP00000266970,ENSP00000274026,ENSP00000288207,ENSP00000358151,ENSP00000378699,ENSP00000388107,ENSP00000429089	CCNA1,CCNA2,CCNB1,CCNB2,CCNE1,CCNE2,CDK1,CDK2,HIST2H2BE,UBA52
HSA-69563	p53-Dependent G1 DNA Damage Response	6	62	1.22e-05	ENSP00000255465,ENSP00000262643,ENSP00000266970,ENSP00000274026,ENSP00000388107,ENSP00000429089	CCNA1,CCNA2,CCNE1,CCNE2,CDK2,UBA52
HSA-5654741	Signaling by FGFR3	5	33	1.34e-05	ENSP00000215832,ENSP00000262995,ENSP00000340944,ENSP00000388107,ENSP00000428056	GAB1,MAPK1,PIK3R1,PTPN11,UBA52
HSA-162658	Golgi Cisternae Pericentriolar Stack Reorganization	4	13	1.43e-05	ENSP00000215832,ENSP00000256442,ENSP00000288207,ENSP00000378699	CCNB1,CCNB2,CDK1,MAPK1
HSA-6804757	Regulation of TP53 Degradation	5	35	1.62e-05	ENSP00000255465,ENSP00000266970,ENSP00000274026,ENSP00000378699,ENSP00000388107	CCNA1,CCNA2,CDK1,CDK2,UBA52
HSA-69017	CDK-mediated phosphorylation and removal of Cdc6	6	68	1.76e-05	ENSP00000255465,ENSP00000262643,ENSP00000266970,ENSP00000274026,ENSP00000388107,ENSP00000429089	CCNA1,CCNA2,CCNE1,CCNE2,CDK2,UBA52
HSA-3700989	Transcriptional Regulation by TP53	11	359	1.77e-05	ENSP00000255465,ENSP00000256442,ENSP00000262643,ENSP00000262746,ENSP00000266970,ENSP00000274026,ENSP00000301522,ENSP00000363641,ENSP00000378699,ENSP00000388107,ENSP00000429089	CCNA1,CCNA2,CCNB1,CCNE1,CCNE2,CDK1,CDK2,PRDX1,PRDX2,TXN,UBA52
HSA-5654743	Signaling by FGFR4	5	36	1.77e-05	ENSP00000215832,ENSP00000262995,ENSP00000340944,ENSP00000388107,ENSP00000428056	GAB1,MAPK1,PIK3R1,PTPN11,UBA52
HSA-170145	Phosphorylation of proteins involved in the G2/M transition by Cyclin A:Cdc2 complexes	3	3	2.41e-05	ENSP00000255465,ENSP00000274026,ENSP00000378699	CCNA1,CCNA2,CDK1
HSA-176408	Regulation of APC/C activators between G1/S and early anaphase	6	76	2.91e-05	ENSP00000255465,ENSP00000256442,ENSP00000266970,ENSP00000274026,ENSP00000378699,ENSP00000388107	CCNA1,CCNA2,CCNB1,CDK1,CDK2,UBA52
HSA-187037	Signaling by NTRK1 (TRKA)	6	76	2.91e-05	ENSP00000215832,ENSP00000222254,ENSP00000304895,ENSP00000365016,ENSP00000401303,ENSP00000428056	IRS1,IRS2,MAPK1,PIK3R1,PIK3R2,SHC1
HSA-177929	Signaling by EGFR	5	42	3.15e-05	ENSP00000262995,ENSP00000340944,ENSP00000388107,ENSP00000401303,ENSP00000428056	GAB1,PIK3R1,PTPN11,SHC1,UBA52
HSA-5654736	Signaling by FGFR1	5	42	3.15e-05	ENSP00000215832,ENSP00000262995,ENSP00000340944,ENSP00000388107,ENSP00000428056	GAB1,MAPK1,PIK3R1,PTPN11,UBA52
HSA-1236382	Constitutive Signaling by Ligand-Responsive EGFR Cancer Variants	4	18	3.52e-05	ENSP00000262995,ENSP00000388107,ENSP00000401303,ENSP00000428056	GAB1,PIK3R1,SHC1,UBA52
HSA-69200	Phosphorylation of proteins involved in G1/S transition by active Cyclin E:Cdk2 complexes	3	4	3.7e-05	ENSP00000262643,ENSP00000266970,ENSP00000429089	CCNE1,CCNE2,CDK2
HSA-69275	G2/M Transition	8	189	4.35e-05	ENSP00000255465,ENSP00000256442,ENSP00000266970,ENSP00000274026,ENSP00000288207,ENSP00000378699,ENSP00000388107,ENSP00000448012	CCNA1,CCNA2,CCNB1,CCNB2,CDK1,CDK2,CEP290,UBA52
HSA-512988	Interleukin-3, Interleukin-5 and GM-CSF signaling	5	47	4.54e-05	ENSP00000222254,ENSP00000340944,ENSP00000388107,ENSP00000401303,ENSP00000428056	PIK3R1,PIK3R2,PTPN11,SHC1,UBA52
HSA-202733	Cell surface interactions at the vascular wall	7	135	4.74e-05	ENSP00000222254,ENSP00000314897,ENSP00000339191,ENSP00000340944,ENSP00000401303,ENSP00000419425,ENSP00000428056	ANGPT2,CAV1,PIK3R1,PIK3R2,PPIA,PTPN11,SHC1
HSA-68911	G2 Phase	3	5	5.29e-05	ENSP00000255465,ENSP00000266970,ENSP00000274026	CCNA1,CCNA2,CDK2
HSA-69478	G2/M DNA replication checkpoint	3	5	5.29e-05	ENSP00000256442,ENSP00000288207,ENSP00000378699	CCNB1,CCNB2,CDK1
HSA-75153	Apoptotic execution phase	5	51	6.12e-05	ENSP00000257192,ENSP00000307705,ENSP00000330074,ENSP00000339566,ENSP00000369129	DSG1,DSP,HIST1H1B,HIST1H1C,HIST1H1E
HSA-8848021	Signaling by PTK6	5	51	6.12e-05	ENSP00000227507,ENSP00000257904,ENSP00000262643,ENSP00000266970,ENSP00000388107	CCND1,CCNE1,CDK2,CDK4,UBA52
HSA-8878171	Transcriptional regulation by RUNX1	8	201	6.12e-05	ENSP00000227507,ENSP00000261254,ENSP00000265734,ENSP00000332194,ENSP00000340944,ENSP00000358151,ENSP00000362082,ENSP00000388107	CCND1,CCND2,CCND3,CDK6,HIST2H2AC,HIST2H2BE,PTPN11,UBA52
HSA-9006934	Signaling by Receptor Tyrosine Kinases	11	437	7.51e-05	ENSP00000215832,ENSP00000222254,ENSP00000262995,ENSP00000304895,ENSP00000339191,ENSP00000340944,ENSP00000365016,ENSP00000388107,ENSP00000400365,ENSP00000401303,ENSP00000428056	CAV1,GAB1,IRS1,IRS2,LAMA2,MAPK1,PIK3R1,PIK3R2,PTPN11,SHC1,UBA52
HSA-168256	Immune System	24	1925	7.56e-05	ENSP00000215832,ENSP00000222254,ENSP00000227507,ENSP00000236671,ENSP00000241052,ENSP00000257192,ENSP00000257198,ENSP00000261714,ENSP00000269491,ENSP00000304895,ENSP00000340944,ENSP00000346032,ENSP00000346442,ENSP00000349446,ENSP00000363641,ENSP00000365016,ENSP00000369129,ENSP00000373370,ENSP00000378669,ENSP00000388107,ENSP00000401303,ENSP00000419425,ENSP00000428056,ENSP00000448012	ALDOA,ANXA2,ARG1,BLMH,CAT,CCND1,CEP290,CTSD,DSC1,DSG1,DSP,FLG2,IRS1,IRS2,LRMP,MAPK1,PIK3R1,PIK3R2,PPIA,PTPN11,SERPINB12,SHC1,TXN,UBA52
HSA-449147	Signaling by Interleukins	11	439	7.56e-05	ENSP00000215832,ENSP00000222254,ENSP00000227507,ENSP00000304895,ENSP00000340944,ENSP00000346032,ENSP00000365016,ENSP00000388107,ENSP00000401303,ENSP00000419425,ENSP00000428056	ANXA2,CCND1,IRS1,IRS2,MAPK1,PIK3R1,PIK3R2,PPIA,PTPN11,SHC1,UBA52
HSA-9006335	Signaling by Erythropoietin	4	24	7.56e-05	ENSP00000262995,ENSP00000365016,ENSP00000401303,ENSP00000428056	GAB1,IRS2,PIK3R1,SHC1
HSA-5663202	Diseases of signal transduction	10	360	8.25e-05	ENSP00000215832,ENSP00000222254,ENSP00000261349,ENSP00000262995,ENSP00000304895,ENSP00000340944,ENSP00000365016,ENSP00000388107,ENSP00000401303,ENSP00000428056	GAB1,IRS1,IRS2,LRP6,MAPK1,PIK3R1,PIK3R2,PTPN11,SHC1,UBA52
HSA-1266695	Interleukin-7 signaling	4	25	8.33e-05	ENSP00000222254,ENSP00000304895,ENSP00000365016,ENSP00000428056	IRS1,IRS2,PIK3R1,PIK3R2
HSA-68875	Mitotic Prophase	6	101	9.48e-05	ENSP00000215832,ENSP00000256442,ENSP00000288207,ENSP00000332194,ENSP00000358151,ENSP00000378699	CCNB1,CCNB2,CDK1,HIST2H2AC,HIST2H2BE,MAPK1
HSA-2980767	Activation of NIMA Kinases NEK9, NEK6, NEK7	3	7	9.61e-05	ENSP00000256442,ENSP00000288207,ENSP00000378699	CCNB1,CCNB2,CDK1
HSA-539107	Activation of E2F1 target genes at G1/S	4	28	0.00012	ENSP00000255465,ENSP00000262643,ENSP00000301019,ENSP00000378699	CCNA1,CCNE1,CDK1,CDT1
HSA-2586552	Signaling by Leptin	3	9	0.00017	ENSP00000304895,ENSP00000340944,ENSP00000365016	IRS1,IRS2,PTPN11
HSA-5654738	Signaling by FGFR2	5	66	0.00017	ENSP00000215832,ENSP00000262995,ENSP00000340944,ENSP00000388107,ENSP00000428056	GAB1,MAPK1,PIK3R1,PTPN11,UBA52
HSA-1257604	PIP3 activates AKT signaling	8	242	0.00018	ENSP00000215832,ENSP00000222254,ENSP00000262995,ENSP00000304895,ENSP00000340944,ENSP00000365016,ENSP00000388107,ENSP00000428056	GAB1,IRS1,IRS2,MAPK1,PIK3R1,PIK3R2,PTPN11,UBA52
HSA-68949	Orc1 removal from chromatin	5	68	0.00018	ENSP00000255465,ENSP00000266970,ENSP00000274026,ENSP00000301019,ENSP00000388107	CCNA1,CCNA2,CDK2,CDT1,UBA52
HSA-8878166	Transcriptional regulation by RUNX2	6	115	0.00018	ENSP00000215832,ENSP00000227507,ENSP00000256442,ENSP00000257904,ENSP00000378699,ENSP00000388107	CCNB1,CCND1,CDK1,CDK4,MAPK1,UBA52
HSA-2559585	Oncogene Induced Senescence	4	33	0.0002	ENSP00000215832,ENSP00000257904,ENSP00000265734,ENSP00000388107	CDK4,CDK6,MAPK1,UBA52
HSA-180292	GAB1 signalosome	3	10	0.00021	ENSP00000262995,ENSP00000340944,ENSP00000428056	GAB1,PIK3R1,PTPN11
HSA-109582	Hemostasis	12	601	0.00022	ENSP00000215832,ENSP00000222254,ENSP00000266970,ENSP00000314897,ENSP00000339191,ENSP00000340944,ENSP00000346032,ENSP00000358045,ENSP00000378669,ENSP00000401303,ENSP00000419425,ENSP00000428056	ALDOA,ANGPT2,ANXA2,CAV1,CDK2,ECM1,MAPK1,PIK3R1,PIK3R2,PPIA,PTPN11,SHC1
HSA-176409	APC/C:Cdc20 mediated degradation of mitotic proteins	5	71	0.00022	ENSP00000255465,ENSP00000256442,ENSP00000274026,ENSP00000378699,ENSP00000388107	CCNA1,CCNA2,CCNB1,CDK1,UBA52
HSA-3299685	Detoxification of Reactive Oxygen Species	4	35	0.00024	ENSP00000241052,ENSP00000262746,ENSP00000301522,ENSP00000363641	CAT,PRDX1,PRDX2,TXN
HSA-2514853	Condensation of Prometaphase Chromosomes	3	11	0.00025	ENSP00000256442,ENSP00000288207,ENSP00000378699	CCNB1,CCNB2,CDK1
HSA-76002	Platelet activation, signaling and aggregation	8	256	0.00025	ENSP00000215832,ENSP00000222254,ENSP00000340944,ENSP00000358045,ENSP00000378669,ENSP00000401303,ENSP00000419425,ENSP00000428056	ALDOA,ECM1,MAPK1,PIK3R1,PIK3R2,PPIA,PTPN11,SHC1
HSA-6806834	Signaling by MET	5	76	0.00028	ENSP00000262995,ENSP00000340944,ENSP00000388107,ENSP00000400365,ENSP00000428056	GAB1,LAMA2,PIK3R1,PTPN11,UBA52
HSA-9027276	Erythropoietin activates Phosphoinositide-3-kinase (PI3K)	3	12	0.0003	ENSP00000262995,ENSP00000365016,ENSP00000428056	GAB1,IRS2,PIK3R1
HSA-211227	Activation of DNA fragmentation factor	3	13	0.00036	ENSP00000307705,ENSP00000330074,ENSP00000339566	HIST1H1B,HIST1H1C,HIST1H1E
HSA-5654710	PI-3K cascade:FGFR3	3	13	0.00036	ENSP00000262995,ENSP00000340944,ENSP00000428056	GAB1,PIK3R1,PTPN11
HSA-5683057	MAPK family signaling cascades	8	273	0.00036	ENSP00000215832,ENSP00000304895,ENSP00000340944,ENSP00000362082,ENSP00000365016,ENSP00000378699,ENSP00000388107,ENSP00000401303	CCND3,CDK1,IRS1,IRS2,MAPK1,PTPN11,SHC1,UBA52
HSA-5693607	Processing of DNA double-strand break ends	5	81	0.00036	ENSP00000255465,ENSP00000266970,ENSP00000274026,ENSP00000358151,ENSP00000388107	CCNA1,CCNA2,CDK2,HIST2H2BE,UBA52
HSA-1295596	Spry regulation of FGF signaling	3	14	0.00041	ENSP00000215832,ENSP00000340944,ENSP00000388107	MAPK1,PTPN11,UBA52
HSA-2299718	Condensation of Prophase Chromosomes	4	42	0.00041	ENSP00000256442,ENSP00000332194,ENSP00000358151,ENSP00000378699	CCNB1,CDK1,HIST2H2AC,HIST2H2BE
HSA-2565942	Regulation of PLK1 Activity at G2/M Transition	5	85	0.00041	ENSP00000256442,ENSP00000288207,ENSP00000378699,ENSP00000388107,ENSP00000448012	CCNB1,CCNB2,CDK1,CEP290,UBA52
HSA-5637810	Constitutive Signaling by EGFRvIII	3	14	0.00041	ENSP00000262995,ENSP00000401303,ENSP00000428056	GAB1,PIK3R1,SHC1
HSA-5654689	PI-3K cascade:FGFR1	3	15	0.00048	ENSP00000262995,ENSP00000340944,ENSP00000428056	GAB1,PIK3R1,PTPN11
HSA-69481	G2/M Checkpoints	6	148	0.00054	ENSP00000256442,ENSP00000266970,ENSP00000288207,ENSP00000358151,ENSP00000378699,ENSP00000388107	CCNB1,CCNB2,CDK1,CDK2,HIST2H2BE,UBA52
HSA-2559584	Formation of Senescence-Associated Heterochromatin Foci (SAHF)	3	16	0.00055	ENSP00000307705,ENSP00000330074,ENSP00000339566	HIST1H1B,HIST1H1C,HIST1H1E
HSA-1227986	Signaling by ERBB2	4	47	0.00058	ENSP00000262995,ENSP00000388107,ENSP00000401303,ENSP00000428056	GAB1,PIK3R1,SHC1,UBA52
HSA-5654720	PI-3K cascade:FGFR4	3	17	0.00064	ENSP00000262995,ENSP00000340944,ENSP00000428056	GAB1,PIK3R1,PTPN11
HSA-5654695	PI-3K cascade:FGFR2	3	18	0.00074	ENSP00000262995,ENSP00000340944,ENSP00000428056	GAB1,PIK3R1,PTPN11
HSA-109581	Apoptosis	6	162	0.00084	ENSP00000257192,ENSP00000307705,ENSP00000330074,ENSP00000339566,ENSP00000369129,ENSP00000388107	DSG1,DSP,HIST1H1B,HIST1H1C,HIST1H1E,UBA52
HSA-5684996	MAPK1/MAPK3 signaling	7	234	0.00084	ENSP00000215832,ENSP00000304895,ENSP00000340944,ENSP00000365016,ENSP00000378699,ENSP00000388107,ENSP00000401303	CDK1,IRS1,IRS2,MAPK1,PTPN11,SHC1,UBA52
HSA-912446	Meiotic recombination	4	55	0.00097	ENSP00000257904,ENSP00000266970,ENSP00000332194,ENSP00000358151	CDK2,CDK4,HIST2H2AC,HIST2H2BE
HSA-912631	Regulation of signaling by CBL	3	21	0.0011	ENSP00000222254,ENSP00000388107,ENSP00000428056	PIK3R1,PIK3R2,UBA52
HSA-112409	RAF-independent MAPK1/3 activation	3	22	0.0012	ENSP00000215832,ENSP00000340944,ENSP00000378699	CDK1,MAPK1,PTPN11
HSA-174048	APC/C:Cdc20 mediated degradation of Cyclin B	3	22	0.0012	ENSP00000256442,ENSP00000378699,ENSP00000388107	CCNB1,CDK1,UBA52
HSA-9006115	Signaling by NTRK2 (TRKB)	3	22	0.0012	ENSP00000262995,ENSP00000340944,ENSP00000428056	GAB1,PIK3R1,PTPN11
HSA-982772	Growth hormone receptor signaling	3	22	0.0012	ENSP00000215832,ENSP00000304895,ENSP00000365016	IRS1,IRS2,MAPK1
HSA-68886	M Phase	8	343	0.0013	ENSP00000215832,ENSP00000256442,ENSP00000288207,ENSP00000332194,ENSP00000358151,ENSP00000378699,ENSP00000388107,ENSP00000448012	CCNB1,CCNB2,CDK1,CEP290,HIST2H2AC,HIST2H2BE,MAPK1,UBA52
HSA-8865999	MET activates PTPN11	2	4	0.0016	ENSP00000262995,ENSP00000340944	GAB1,PTPN11
HSA-912526	Interleukin receptor SHC signaling	3	26	0.0017	ENSP00000222254,ENSP00000401303,ENSP00000428056	PIK3R1,PIK3R2,SHC1
HSA-174184	Cdc20:Phospho-APC/C mediated degradation of Cyclin A	4	68	0.0018	ENSP00000255465,ENSP00000274026,ENSP00000378699,ENSP00000388107	CCNA1,CCNA2,CDK1,UBA52
HSA-186763	Downstream signal transduction	3	27	0.0018	ENSP00000222254,ENSP00000340944,ENSP00000428056	PIK3R1,PIK3R2,PTPN11
HSA-8939211	ESR-mediated signaling	5	124	0.0018	ENSP00000215832,ENSP00000227507,ENSP00000236671,ENSP00000332194,ENSP00000358151	CCND1,CTSD,HIST2H2AC,HIST2H2BE,MAPK1
HSA-5688426	Deubiquitination	7	279	0.002	ENSP00000255465,ENSP00000274026,ENSP00000332194,ENSP00000358151,ENSP00000378699,ENSP00000388107,ENSP00000426613	CCNA1,CCNA2,CDK1,HIST2H2AC,HIST2H2BE,TNIP3,UBA52
HSA-74713	IRS activation	2	5	0.0021	ENSP00000304895,ENSP00000365016	IRS1,IRS2
HSA-8851907	MET activates PI3K/AKT signaling	2	5	0.0021	ENSP00000262995,ENSP00000428056	GAB1,PIK3R1
HSA-8852276	The role of GTSE1 in G2/M progression after G2 checkpoint	4	73	0.0022	ENSP00000256442,ENSP00000288207,ENSP00000378699,ENSP00000388107	CCNB1,CCNB2,CDK1,UBA52
HSA-73894	DNA Repair	7	290	0.0024	ENSP00000255465,ENSP00000266970,ENSP00000274026,ENSP00000333376,ENSP00000351697,ENSP00000358151,ENSP00000388107	CCNA1,CCNA2,CDK2,HIST2H2BE,REV3L,UBA52,USP45
HSA-112412	SOS-mediated signalling	2	6	0.0027	ENSP00000304895,ENSP00000365016	IRS1,IRS2
HSA-176417	Phosphorylation of Emi1	2	6	0.0027	ENSP00000256442,ENSP00000378699	CCNB1,CDK1
HSA-3301854	Nuclear Pore Complex (NPC) Disassembly	3	32	0.0027	ENSP00000256442,ENSP00000288207,ENSP00000378699	CCNB1,CCNB2,CDK1
HSA-9028335	Activated NTRK2 signals through PI3K	2	6	0.0027	ENSP00000262995,ENSP00000428056	GAB1,PIK3R1
HSA-9603381	Activated NTRK3 signals through PI3K	2	6	0.0027	ENSP00000304895,ENSP00000428056	IRS1,PIK3R1
HSA-68962	Activation of the pre-replicative complex	3	33	0.0029	ENSP00000230056,ENSP00000266970,ENSP00000301019	CDK2,CDT1,GMNN
HSA-70263	Gluconeogenesis	3	33	0.0029	ENSP00000229239,ENSP00000234590,ENSP00000378669	ALDOA,ENO1,GAPDH
HSA-114604	GPVI-mediated activation cascade	3	34	0.0031	ENSP00000222254,ENSP00000340944,ENSP00000428056	PIK3R1,PIK3R2,PTPN11
HSA-69002	DNA Replication Pre-Initiation	4	82	0.0032	ENSP00000230056,ENSP00000266970,ENSP00000301019,ENSP00000388107	CDK2,CDT1,GMNN,UBA52
HSA-112411	MAPK1 (ERK2) activation	2	8	0.0041	ENSP00000215832,ENSP00000340944	MAPK1,PTPN11
HSA-5689896	Ovarian tumor domain proteases	3	38	0.0041	ENSP00000378699,ENSP00000388107,ENSP00000426613	CDK1,TNIP3,UBA52
HSA-1433557	Signaling by SCF-KIT	3	40	0.0046	ENSP00000222254,ENSP00000340944,ENSP00000428056	PIK3R1,PIK3R2,PTPN11
HSA-1643685	Disease	13	1018	0.0046	ENSP00000215832,ENSP00000222254,ENSP00000261349,ENSP00000262746,ENSP00000262995,ENSP00000301522,ENSP00000304895,ENSP00000340944,ENSP00000365016,ENSP00000388107,ENSP00000401303,ENSP00000419425,ENSP00000428056	GAB1,IRS1,IRS2,LRP6,MAPK1,PIK3R1,PIK3R2,PPIA,PRDX1,PRDX2,PTPN11,SHC1,UBA52
HSA-6804756	Regulation of TP53 Activity through Phosphorylation	4	92	0.0046	ENSP00000255465,ENSP00000266970,ENSP00000274026,ENSP00000388107	CCNA1,CCNA2,CDK2,UBA52
HSA-110056	MAPK3 (ERK1) activation	2	9	0.0048	ENSP00000340944,ENSP00000378699	CDK1,PTPN11
HSA-113507	E2F-enabled inhibition of pre-replication complex formation	2	9	0.0048	ENSP00000256442,ENSP00000378699	CCNB1,CDK1
HSA-2465910	MASTL Facilitates Mitotic Progression	2	9	0.0048	ENSP00000256442,ENSP00000378699	CCNB1,CDK1
HSA-422475	Axon guidance	9	541	0.0048	ENSP00000215832,ENSP00000222254,ENSP00000262995,ENSP00000288699,ENSP00000340944,ENSP00000365016,ENSP00000388107,ENSP00000401303,ENSP00000428056	DPYSL5,GAB1,IRS2,MAPK1,PIK3R1,PIK3R2,PTPN11,SHC1,UBA52
HSA-8853334	Signaling by FGFR3 fusions in cancer	2	9	0.0048	ENSP00000262995,ENSP00000428056	GAB1,PIK3R1
HSA-1236394	Signaling by ERBB4	3	42	0.005	ENSP00000388107,ENSP00000401303,ENSP00000428056	PIK3R1,SHC1,UBA52
HSA-5655291	Signaling by FGFR4 in disease	2	10	0.0055	ENSP00000262995,ENSP00000428056	GAB1,PIK3R1
HSA-351906	Apoptotic cleavage of cell adhesion proteins	2	11	0.0065	ENSP00000257192,ENSP00000369129	DSG1,DSP
HSA-71387	Metabolism of carbohydrates	6	266	0.0071	ENSP00000035307,ENSP00000229239,ENSP00000234590,ENSP00000378669,ENSP00000388107,ENSP00000427888	ALDOA,CHPF2,ENO1,GAPDH,HS3ST5,UBA52
HSA-3214858	RMTs methylate histone arginines	3	49	0.0073	ENSP00000227507,ENSP00000257904,ENSP00000332194	CCND1,CDK4,HIST2H2AC
HSA-4419969	Depolymerisation of the Nuclear Lamina	2	12	0.0073	ENSP00000256442,ENSP00000378699	CCNB1,CDK1
HSA-69229	Ubiquitin-dependent degradation of Cyclin D1	3	49	0.0073	ENSP00000227507,ENSP00000257904,ENSP00000388107	CCND1,CDK4,UBA52
HSA-1963642	PI3K events in ERBB2 signaling	2	13	0.0083	ENSP00000262995,ENSP00000428056	GAB1,PIK3R1
HSA-75035	Chk1/Chk2(Cds1) mediated inactivation of Cyclin B:Cdk1 complex	2	13	0.0083	ENSP00000256442,ENSP00000378699	CCNB1,CDK1
HSA-9027284	Erythropoietin activates RAS	2	13	0.0083	ENSP00000365016,ENSP00000401303	IRS2,SHC1
HSA-9018519	Estrogen-dependent gene expression	4	118	0.0098	ENSP00000227507,ENSP00000236671,ENSP00000332194,ENSP00000358151	CCND1,CTSD,HIST2H2AC,HIST2H2BE
HSA-68827	CDT1 association with the CDC6:ORC:origin complex	3	56	0.01	ENSP00000230056,ENSP00000301019,ENSP00000388107	CDT1,GMNN,UBA52
HSA-201681	TCF dependent signaling in response to WNT	5	198	0.0101	ENSP00000261349,ENSP00000332194,ENSP00000339191,ENSP00000358151,ENSP00000388107	CAV1,HIST2H2AC,HIST2H2BE,LRP6,UBA52
HSA-2730905	Role of LAT2/NTAL/LAB on calcium mobilization	2	15	0.0103	ENSP00000222254,ENSP00000428056	PIK3R1,PIK3R2
HSA-5689880	Ub-specific processing proteases	5	202	0.0108	ENSP00000255465,ENSP00000274026,ENSP00000332194,ENSP00000358151,ENSP00000388107	CCNA1,CCNA2,HIST2H2AC,HIST2H2BE,UBA52
HSA-110312	Translesion synthesis by REV1	2	16	0.0114	ENSP00000351697,ENSP00000388107	REV3L,UBA52
HSA-1362300	Transcription of E2F targets under negative control by p107 (RBL1) and p130 (RBL2) in complex with HDAC1	2	16	0.0114	ENSP00000274026,ENSP00000378699	CCNA2,CDK1
HSA-156711	Polo-like kinase mediated events	2	16	0.0114	ENSP00000256442,ENSP00000288207	CCNB1,CCNB2
HSA-175474	Assembly Of The HIV Virion	2	16	0.0114	ENSP00000388107,ENSP00000419425	PPIA,UBA52
HSA-936964	Activation of IRF3/IRF7 mediated by TBK1/IKK epsilon	2	16	0.0114	ENSP00000340944,ENSP00000388107	PTPN11,UBA52
HSA-2454202	Fc epsilon receptor (FCERI) signaling	4	126	0.0117	ENSP00000215832,ENSP00000222254,ENSP00000388107,ENSP00000428056	MAPK1,PIK3R1,PIK3R2,UBA52
HSA-388841	Costimulation by the CD28 family	3	61	0.0119	ENSP00000222254,ENSP00000340944,ENSP00000428056	PIK3R1,PIK3R2,PTPN11
HSA-1912408	Pre-NOTCH Transcription and Translation	3	62	0.0123	ENSP00000227507,ENSP00000332194,ENSP00000358151	CCND1,HIST2H2AC,HIST2H2BE
HSA-5655862	Translesion synthesis by POLK	2	17	0.0123	ENSP00000351697,ENSP00000388107	REV3L,UBA52
HSA-5656121	Translesion synthesis by POLI	2	17	0.0123	ENSP00000351697,ENSP00000388107	REV3L,UBA52
HSA-176412	Phosphorylation of the APC/C	2	18	0.0134	ENSP00000256442,ENSP00000378699	CCNB1,CDK1
HSA-6804114	TP53 Regulates Transcription of Genes Involved in G2 Cell Cycle Arrest	2	18	0.0134	ENSP00000256442,ENSP00000378699	CCNB1,CDK1
HSA-8853338	Signaling by FGFR3 point mutants in cancer	2	18	0.0134	ENSP00000262995,ENSP00000428056	GAB1,PIK3R1
HSA-70171	Glycolysis	3	66	0.0141	ENSP00000229239,ENSP00000234590,ENSP00000378669	ALDOA,ENO1,GAPDH
HSA-162582	Signal Transduction	22	2605	0.0159	ENSP00000215832,ENSP00000222254,ENSP00000227507,ENSP00000236671,ENSP00000257904,ENSP00000261349,ENSP00000262643,ENSP00000262995,ENSP00000266970,ENSP00000304895,ENSP00000309493,ENSP00000332194,ENSP00000339191,ENSP00000340944,ENSP00000358151,ENSP00000362082,ENSP00000365016,ENSP00000378699,ENSP00000388107,ENSP00000400365,ENSP00000401303,ENSP00000428056	CAV1,CCND1,CCND3,CCNE1,CDK1,CDK2,CDK4,CTSD,GAB1,GPRC6A,HIST2H2AC,HIST2H2BE,IRS1,IRS2,LAMA2,LRP6,MAPK1,PIK3R1,PIK3R2,PTPN11,SHC1,UBA52
HSA-5673001	RAF/MAP kinase cascade	5	229	0.0166	ENSP00000215832,ENSP00000304895,ENSP00000365016,ENSP00000388107,ENSP00000401303	IRS1,IRS2,MAPK1,SHC1,UBA52
HSA-4641263	Regulation of FZD by ubiquitination	2	21	0.0171	ENSP00000261349,ENSP00000388107	LRP6,UBA52
HSA-389357	CD28 dependent PI3K/Akt signaling	2	22	0.0185	ENSP00000222254,ENSP00000428056	PIK3R1,PIK3R2
HSA-8862803	Deregulated CDK5 triggers multiple neurodegenerative pathways in Alzheimer's disease models	2	22	0.0185	ENSP00000262746,ENSP00000301522	PRDX1,PRDX2
HSA-373753	Nephrin family interactions	2	23	0.0197	ENSP00000222254,ENSP00000428056	PIK3R1,PIK3R2
HSA-69473	G2/M DNA damage checkpoint	3	78	0.0211	ENSP00000256442,ENSP00000358151,ENSP00000378699	CCNB1,CDK1,HIST2H2BE
HSA-977225	Amyloid fiber formation	3	78	0.0211	ENSP00000332194,ENSP00000358151,ENSP00000388107	HIST2H2AC,HIST2H2BE,UBA52
HSA-2029485	Role of phospholipids in phagocytosis	2	25	0.0225	ENSP00000222254,ENSP00000428056	PIK3R1,PIK3R2
HSA-210991	Basigin interactions	2	25	0.0225	ENSP00000339191,ENSP00000419425	CAV1,PPIA
HSA-2424491	DAP12 signaling	2	26	0.0239	ENSP00000222254,ENSP00000428056	PIK3R1,PIK3R2
HSA-5223345	Miscellaneous transport and binding events	2	26	0.0239	ENSP00000291009,ENSP00000292401	AZGP1,PIP
HSA-5628897	TP53 Regulates Metabolic Genes	3	83	0.0243	ENSP00000262746,ENSP00000301522,ENSP00000363641	PRDX1,PRDX2,TXN
HSA-2029480	Fcgamma receptor (FCGR) dependent phagocytosis	3	84	0.0249	ENSP00000215832,ENSP00000222254,ENSP00000428056	MAPK1,PIK3R1,PIK3R2
HSA-5687128	MAPK6/MAPK4 signaling	3	86	0.0263	ENSP00000362082,ENSP00000378699,ENSP00000388107	CCND3,CDK1,UBA52
HSA-162588	Budding and maturation of HIV virion	2	28	0.0267	ENSP00000388107,ENSP00000419425	PPIA,UBA52
HSA-202424	Downstream TCR signaling	3	89	0.0285	ENSP00000222254,ENSP00000388107,ENSP00000428056	PIK3R1,PIK3R2,UBA52
HSA-4641262	Disassembly of the destruction complex and recruitment of AXIN to the membrane	2	31	0.0318	ENSP00000261349,ENSP00000339191	CAV1,LRP6
HSA-5689901	Metalloprotease DUBs	2	31	0.0318	ENSP00000332194,ENSP00000388107	HIST2H2AC,UBA52
HSA-4420097	VEGFA-VEGFR2 Pathway	3	95	0.0333	ENSP00000222254,ENSP00000339191,ENSP00000428056	CAV1,PIK3R1,PIK3R2
HSA-73728	RNA Polymerase I Promoter Opening	2	32	0.0333	ENSP00000332194,ENSP00000358151	HIST2H2AC,HIST2H2BE
HSA-8939236	RUNX1 regulates transcription of genes involved in differentiation of HSCs	3	96	0.034	ENSP00000332194,ENSP00000358151,ENSP00000388107	HIST2H2AC,HIST2H2BE,UBA52
HSA-937061	TRIF(TICAM1)-mediated TLR4 signaling	3	96	0.034	ENSP00000215832,ENSP00000340944,ENSP00000388107	MAPK1,PTPN11,UBA52
HSA-171306	Packaging Of Telomere Ends	2	33	0.0344	ENSP00000332194,ENSP00000358151	HIST2H2AC,HIST2H2BE
HSA-5655302	Signaling by FGFR1 in disease	2	33	0.0344	ENSP00000262995,ENSP00000428056	GAB1,PIK3R1
HSA-5334118	DNA methylation	2	34	0.0361	ENSP00000332194,ENSP00000358151	HIST2H2AC,HIST2H2BE
HSA-68877	Mitotic Prometaphase	4	190	0.0387	ENSP00000256442,ENSP00000288207,ENSP00000378699,ENSP00000448012	CCNB1,CCNB2,CDK1,CEP290
HSA-5625886	Activated PKN1 stimulates transcription of AR (androgen receptor) regulated genes KLK2 and KLK3	2	36	0.0394	ENSP00000332194,ENSP00000358151	HIST2H2AC,HIST2H2BE
HSA-427359	SIRT1 negatively regulates rRNA expression	2	37	0.041	ENSP00000332194,ENSP00000358151	HIST2H2AC,HIST2H2BE
HSA-157118	Signaling by NOTCH	4	197	0.0425	ENSP00000227507,ENSP00000332194,ENSP00000358151,ENSP00000388107	CCND1,HIST2H2AC,HIST2H2BE,UBA52
HSA-390471	Association of TriC/CCT with target proteins during biosynthesis	2	38	0.0426	ENSP00000262643,ENSP00000429089	CCNE1,CCNE2
HSA-8950505	Gene and protein expression by JAK-STAT signaling after Interleukin-12 stimulation	2	38	0.0426	ENSP00000346032,ENSP00000419425	ANXA2,PPIA
HSA-983705	Signaling by the B Cell Receptor (BCR)	3	107	0.0426	ENSP00000388107,ENSP00000419425,ENSP00000428056	PIK3R1,PPIA,UBA52
HSA-5655253	Signaling by FGFR2 in disease	2	39	0.0441	ENSP00000262995,ENSP00000428056	GAB1,PIK3R1
HSA-8875878	MET promotes cell motility	2	39	0.0441	ENSP00000262995,ENSP00000400365	GAB1,LAMA2
HSA-5675221	Negative regulation of MAPK pathway	2	40	0.0455	ENSP00000215832,ENSP00000388107	MAPK1,UBA52
HSA-416476	G alpha (q) signalling events	4	205	0.0467	ENSP00000215832,ENSP00000222254,ENSP00000309493,ENSP00000428056	GPRC6A,MAPK1,PIK3R1,PIK3R2
HSA-212300	PRC2 methylates histones and DNA	2	42	0.0493	ENSP00000332194,ENSP00000358151	HIST2H2AC,HIST2H2BE
HSA-5696395	Formation of Incision Complex in GG-NER	2	42	0.0493	ENSP00000333376,ENSP00000388107	UBA52,USP45
